# Supplementary material for: Methylation patterns in serum DNA for early identification of disseminated breast cancer
Source: Springer Nature journal article supplement (doi:10.1186/s13073-017-0499-9), 2017-12-01
Supplement: MOESM3 [file 13073_2017_499_MOESM3_ESM.pdf]

## Supplementary Tables

| #   | Coordinates              | Primer sequence 1                    | Primer sequence 2                   | Amplicon size |
|-----|--------------------------|--------------------------------------|-------------------------------------|---------------|
| 89  | chr1:3157511-3157650     | GGGGTGYGGGGAGGTTGAGA                 | TCCCCRACTCCCCAACCTC                 | 140           |
| 91  | chr2:19550330-19550456   | GGYGTGAAGTTGGAGAGGTTATTTTG           | CCRAAACTCTTCTCCTTAAAAACAAAC         | 127           |
| 92  | chr2:19550279-19550427   | GGTTTTTTTAGTTTTAGYGTTTTGA            | TACAACAAAAAACTTATAATCCAATTATCATC    | 149           |
| 93  | chr3:194118853-194118957 | YGTGAGGTTGGTGGGTAGGTTTAG             | TTCCCCATCCRCCAACCTTACAATATATCTTC    | 105           |
| 94  | chr3:194118827-194118950 | GTTYGTAGTTTTGTAAGTGTGTTTTT           | CRACCCATTCCRAAAAAACAAATATA          | 124           |
| 95  | chr3:128712373-128712480 | GAATAATAGATAAGGGTGGTTGGTAGTAAGTA     | TCACCTAAAACAAACATTCCAAAAACC         | 108           |
| 96  | chr3:128712370-128712482 | GTTTTATTGGGGTAGGTATTTTGAAGTT         | AAAAAACAAATAAAAAATACTAACATAAACA     | 113           |
| 97  | chr4:139483017-139483134 | TYGGGATAGTATTTTGGGAGTTGGG            | ACCAAACRCCCATCCAATTTACCTA           | 118           |
| 98  | chr4:139483009-139483139 | YGGYGGTAGAYGTTTATTTAATTTGTTTG        | CTACAATCCRAAACACACCTTAAAAACTAAA     | 131           |
| 99  | chr8:103629512-103629661 | TTTTGTATTTTTTTAGTAGAGAYGGTTTTTAT     | TAAAAACCCCTCTCTTCCRAATA             | 150           |
| 101 | chr8:145106870-145106994 | TTTTYGTYYYGTAGGTATTYGGTATTTTTG       | RCCTCCTCACRAAAAAACACT               | 125           |
| 102 | chr8:145106096-145106222 | GTGTTTTTTAAGGTAAGTATAGATGAGGGG       | CCRCRAATAAAAAATACCTTAAATCTCC        | 127           |
| 103 | chr8:145106092-145106211 | GATGTTTTAAGTTTTTYGGTTTTGGGGA         | CTCAATATCCCTCAAACAAACAAATAAAAAA     | 120           |
| 105 | chr8:145103775-145103893 | TGTGTAAGTYGGTAGGTTGTTGA              | AAATCCAAAAATAAAATTTAAATCAAATCCCTTT  | 119           |
| 106 | chr9:100069971-100070085 | GGTAGAGTGAAGTATAAGTAATAATTTGTATTATT  | AAATAAACTCTAAACTCRAACAAAAAC         | 115           |
| 107 | chr9:100069972-100070073 | AATTYGAGTAGGAGGTYGGTTTTTTTT          | ACAAAATAAAACACAACAAATAATCCTATATTATT | 102           |
| 108 | chr9:139553849-139553943 | ATTTTTTTTTTTGTATTTTTGTAGTTYGGTTTT    | CAAAAACCAACCTAAACATCTCAATAA         | 95            |
| 109 | chr9:139553853-139553951 | GTTTTTGGTAGAGGTTAGTTTTGGGTATTTAGGTGG | CCTCCTCTACACCTCCTACAACC             | 99            |
| 110 | chr11:62693570-62693687  | TAGTTTTYGAAGAAAAGATGGGTTTGGGG        | AACRCCRAATCAACTCAACRAAATCTC         | 118           |
| 111 | chr11:62693550-62693659  | GGTYGGGTTATAAGGATTYGGGAA             | CCAACCCCAATCTTACRAACAATTCC          | 110           |
| 112 | chr12:49390739-49390861  | GGAGTYGTTATGGAYGTTGAGTTTTTTAGTTT     | TAAACRCAACCCCAAAACCCCTA             | 123           |
| 113 | chr12:49390712-49390852  | ATTTTAGGTTTTTAYGTYGGGTTTTTG          | CRAAACTTCTATATCRCTTCCATCAAAAAAC     | 141           |
| 114 | chr16:1271174-1271302    | GTTTTAYGAGTTTTYGTYYGTTTTGGTT         | AATACCCRATCTTCRTCCACAAA             | 129           |
| 115 | chr16:1271197-1271314    | TTTTTTTTGGYGGGTGTYGGTTTTT            | TAATTCRAATTTCTCCRAATTTTACTACCAAC    | 118           |
| 116 | chr17:43037200-43037354  | TTTTYGTGTAGGGAATYGGGTTGAT            | CTCATCTCAAAACRCAAAAAACAAACC         | 155           |
| 117 | chr17:59532206-59532307  | GTTTTTTTTGYGATTTYGTAGGT              | CRCTAAATCCAATATATCTAAAACCC          | 102           |
| 118 | chr17:59532225-59532309  | YGYGTTGGGTTAATTATATTTAGGGTTT         | CAAACRCCACATCTAAAACCAA              | 85            |
| 119 | chr19:17439718-17439872  | TYGGTATAGGTGYGGTTGTAGGATTT           | GCCCCAAAAAATAATCCCCCRATCC           | 155           |
| 120 | chr19:17439774-17439875  | GGYGTTTAGGAGGGTGAGTTTTT              | TCAACAACRTAACCAACATCTAAAAACAAA      | 102           |
| 121 | chrX:152245134-152245286 | ATTTTTYGGTYGAGTTYGATTAGGGT           | CATCCTAAACATCCCRAAAAACTATAATAATAC   | 153           |
| 122 | chrX:152245154-152245280 | GGGTATTTYGGAGGATTGTGATGATGT          | CAAAACRCRATAACATTATCTCTCTCT         | 127           |

**Table S1 Coordinates and primers used to amplify the identified target regions using bisulfite sequencing.**
